# Supplementary material
Source: Springer Nature journal article supplement (https://hal.science/hal-01290524v1/file/13567_2013_326_MOESM4_ESM.pdf)

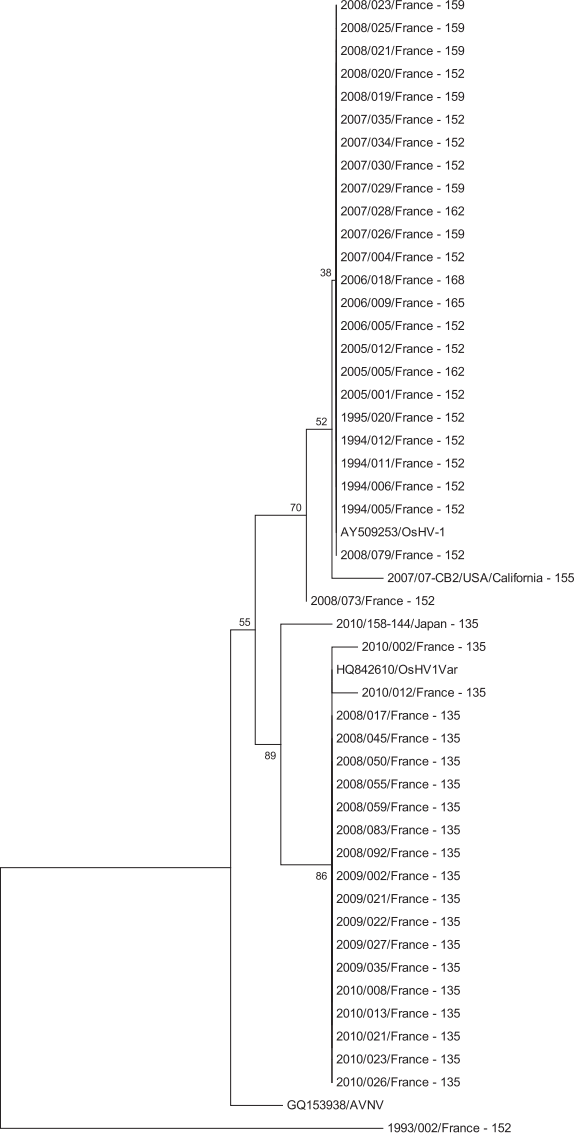

0.005

Supplement: MOESM4 [file 13567_2013_326_MOESM4_ESM.pdf]
